# Supplementary material for: RNA sequencing-based identification of microRNAs in the antler cartilage of Gansu red deer (Cervus elaphus kansuensis)
Source: PeerJ. 2022 Sep 21;10:e13947. doi: 10.7717/peerj.13947 (PMC9508884; doi:10.7717/peerj.13947)
Supplement: Data S1 [file peerj-10-13947-s007.xls]

## Sheet: Sheet1
Genes	30 d_Ct	30 d_Ct mean	30 d_Keep two decimal places	SD	60 d_Ct	60 d_Ct mean	60 d_Keep two decimal places	SD	90 d_Ct	90 d_Ct mean	90 d_Keep two decimal places	SD
U6	11.6063	11.7594	11.76	0.113365	13.1398	13.1435	13.14	0.00659042	12.288	12.2377	12.24	0.123982
	11.8771				13.1379				12.358
	11.795				13.1527				12.0671
aga-miR-184	30.7522	30.4391	30.44	0.260691	29.5537	29.8536	29.85	0.221644	30.5537	30.2146	30.21	0.279635
	30.114				29.9247				30.221
	30.4511				30.0825				29.8689
bta-miR-146b	22.3513	22.6449	22.64	0.249032	22.2151	22.1223	22.12	0.069922	23.0815	23.2364	23.24	0.176365
	22.9602				22.0464				23.4831
	22.6231				22.1054				23.1445
bta-miR-187	26.6119	27.0209	27.02	0.301816	26.1582	26.3595	26.36	0.186046	27.9164	27.7276	27.73	0.205883
	27.1196				26.3132				27.8252
	27.3312				26.6069				27.4412
bta-miR-27a-5p	24.3985	24.5281	24.53	0.0967432	26.699	26.9413	26.94	0.212933	24.0641	24.183	24.18	0.132388
	24.6308				26.9076				24.1173
	24.5549				27.2173				24.3677
bta-miR-504	33.9022	34.0291	34.03	0.0914195	33.4985	33.6081	33.61	0.0868306	34.5205	34.4537	34.45	0.196494
	34.114				33.7108				34.6539
	34.0711				33.6149				34.1867
cfa-miR-10a	34.2424	34.3394	34.34	0.126646	33.5105	33.4204	33.42	0.212751	34.4761	34.4793	34.48	0.218038
	34.5183				33.6239				34.2139
	34.2575				33.1267				34.7479
chi-miR-411b-3p	36.8591	36.8823	36.88	0.106917	33.4315	33.8316	33.83	0.288082	37.4494	37.1639	37.16	0.222725
	36.6453				33.9647				37.1365
	37.1425				34.0984				36.9059
efu-miR-181a	23.679	23.988	23.99	0.226849	26.7509	26.4466	26.45	0.223324	24.1824	24.3612	24.36	0.139189
	24.0676				26.2213				24.3792
	24.2173				26.3677				24.522
oar-miR-10a	30.0658	30.1181	30.12	0.16439	29.2724	29.3594	29.36	0.133707	30.6787	30.8304	30.83	0.110917
	29.9481				29.5483				30.8715
	30.3405				29.2575				30.9409
ssa-miR-144-5p	33.2494	33.1583	33.16	0.212354	31.8902	32.0418	32.04	0.113669	32.6335	32.6603	32.66	0.207961
	32.8649				32.164				32.9274
	33.3606				32.0711				32.4201
unconservative_CM008019.1_137729	33.8641	34.113	34.11	0.201548	32.9422	33.0424	33.04	0.0730014	33.2144	33.6734	33.67	0.396488
	34.1173				33.114				33.6239
	34.3577				33.0711				34.1818
unconservative_CM008022.1_159134	29.3505	29.1304	29.13	0.190081	31.5061	31.4893	31.49	0.218351	30.2494	29.8734	29.87	0.273671
	29.1539				31.2139				29.7649
	28.8867				31.7479				29.6059
unconservative_CM008039.1_315920	36.268	36.2311	36.23	0.121613	33.1558	33.1315	33.13	0.157039	36.3925	36.405	36.4	0.0390715
	36.358				32.9281				36.4578
	36.0671				33.3105				36.3646
